# Supplementary material for: Factors Contributing to the Success of NIH-Designated Underrepresented Minorities in Academic and Nonacademic Research Positions
Source: PubMed Central journal article supplement — CBE Life Sci Educ. 2018 Summer;17(2):ar35. doi: 10.1187/cbe.16-09-0287 (PMC5998319; doi:10.1187/cbe.16-09-0287), 2018
Supplement: cbe-17-ar35-s001.pdf [file cbe-17-ar35-s001.pdf]

# Supplemental Material

*CBE—Life Sciences Education*

Martinez et al.

## Supplemental Materials

### **Factors contributing to the *success* of NIH-designated underrepresented minorities in academic and non-academic research positions**

Luis R. Martinez<sup>1, 5</sup>, Dwayne W. Boucaud<sup>2</sup>, Arturo Casadevall<sup>3, 6</sup>, and Avery August<sup>4\*</sup>

<sup>1</sup>Department of Biological Sciences, The Border Biomedical Research Center, University of Texas at El Paso, TX; <sup>2</sup>Department of Biomedical Sciences, Quinnipiac University, Hamden, CT; <sup>3</sup>Department of Molecular Microbiology and Immunology, Johns Hopkins Bloomberg School of Public Health, Baltimore, MD; <sup>4</sup>Department of Microbiology and Immunology, Cornell University, Ithaca, NY.

**RUNNING TITLE:** Factors associated with success of underrepresented minorities

Previous affiliation: <sup>5</sup>Department of Biomedical Sciences, NYIT College of Osteopathic Medicine, New York Institute of Technology, Old Westbury, NY; <sup>6</sup>Department of Microbiology and Immunology, Albert Einstein College of Medicine, Bronx, NY.

\*To whom correspondence may be addressed:

Luis R. Martinez: [lmartinez43@utep.edu](mailto:lmartinez43@utep.edu)

Dwayne W. Boucaud: [Dwayne.Boucaud@quinnipiac.edu](mailto:Dwayne.Boucaud@quinnipiac.edu)

Arturo Casadevall: [acasadel@jhu.edu](mailto:acasadel@jhu.edu)

Avery August: [averyaugust@cornell.edu](mailto:averyaugust@cornell.edu)

Supplemental Figures

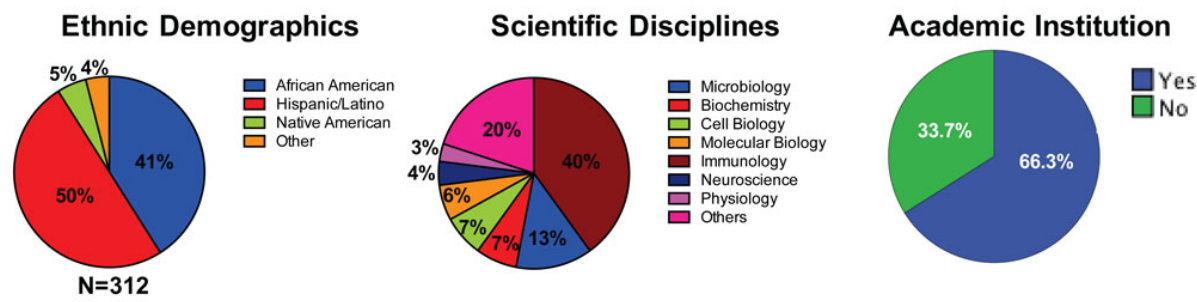

**Supplemental Figure 1. Demographics of survey participants.** Self-reported race/ethnic background, disciplines of survey participants and affiliations.

A)

|                                                |            | Years in Career (Post training) |           |           |           |           |            |
|------------------------------------------------|------------|---------------------------------|-----------|-----------|-----------|-----------|------------|
|                                                |            | 1-5                             | 5-10      | 10-15     | 15-20     | >20       | Total      |
| <b>Undergraduate Institution (URM vs. Maj)</b> | <b>URM</b> | 33                              | 26        | 5         | 7         | 13        | <b>84</b>  |
|                                                | <b>Maj</b> | 54                              | 31        | 29        | 14        | 44        | <b>172</b> |
| <b>Total</b>                                   |            | <b>87</b>                       | <b>57</b> | <b>34</b> | <b>21</b> | <b>57</b> | <b>256</b> |

B)

|                                                     |            | Years in Career (Post training) |           |           |           |           |            |
|-----------------------------------------------------|------------|---------------------------------|-----------|-----------|-----------|-----------|------------|
|                                                     |            | 1-5                             | 5-10      | 10-15     | 15-20     | >20       | Total      |
| <b>Did you perform research as an undergraduate</b> | <b>Yes</b> | 65                              | 52        | 27        | 15        | 38        | <b>197</b> |
|                                                     | <b>No</b>  | 22                              | 3         | 7         | 6         | 18        | <b>56</b>  |
| <b>Total</b>                                        |            | <b>87</b>                       | <b>55</b> | <b>34</b> | <b>21</b> | <b>56</b> | <b>253</b> |

C)

|                                                                                  |               | Years in Career (Post training) |           |           |           |           |            |
|----------------------------------------------------------------------------------|---------------|---------------------------------|-----------|-----------|-----------|-----------|------------|
|                                                                                  |               | 1-5                             | 5-10      | 10-15     | 15-20     | >20       | Total      |
| <b>What best described the size of the laboratory where you gained your PhD?</b> | <b>1-5</b>    | 37                              | 17        | 8         | 10        | 16        | <b>88</b>  |
|                                                                                  | <b>6-10</b>   | 29                              | 24        | 18        | 2         | 18        | <b>91</b>  |
|                                                                                  | <b>11-15</b>  | 5                               | 5         | 4         | 7         | 5         | <b>26</b>  |
|                                                                                  | <b>16-20</b>  | 6                               | 4         | 0         | 1         | 5         | <b>16</b>  |
|                                                                                  | <b>&gt;20</b> | 2                               | 1         | 0         | 0         | 6         | <b>9</b>   |
| <b>Total</b>                                                                     |               | <b>79</b>                       | <b>51</b> | <b>30</b> | <b>20</b> | <b>50</b> | <b>230</b> |

D)

|                                                                                                       |       | Years in Career (Post training) |      |       |       |     |       |
|-------------------------------------------------------------------------------------------------------|-------|---------------------------------|------|-------|-------|-----|-------|
|                                                                                                       |       | 1-5                             | 5-10 | 10-15 | 15-20 | >20 | Total |
| What best described the size of the laboratory where you got your 1 <sup>st</sup> (or only) post-doc? | 1-5   | 17                              | 11   | 5     | 3     | 14  | 50    |
|                                                                                                       | 6-10  | 31                              | 11   | 13    | 6     | 15  | 76    |
|                                                                                                       | 11-15 | 2                               | 10   | 2     | 5     | 6   | 25    |
|                                                                                                       | 16-20 | 4                               | 5    | 4     | 3     | 5   | 21    |
|                                                                                                       | >20   | 5                               | 0    | 5     | 1     | 3   | 14    |
|                                                                                                       | Total | 59                              | 37   | 29    | 18    | 43  | 186   |

E)

|                                                                                 |       | Years in Career (Post training) |      |       |       |     |       |
|---------------------------------------------------------------------------------|-------|---------------------------------|------|-------|-------|-----|-------|
|                                                                                 |       | 1-5                             | 5-10 | 10-15 | 15-20 | >20 | Total |
| Have you been or are you a member of a professional scientific organization(s)? | Yes   | 70                              | 53   | 32    | 21    | 55  | 231   |
|                                                                                 | No    | 5                               | 0    | 0     | 0     | 0   | 5     |
|                                                                                 | Total | 75                              | 53   | 32    | 21    | 55  | 236   |

F)

|                                                                                                                 |     | Years in Career (Post training) |      |       |       |     |       |
|-----------------------------------------------------------------------------------------------------------------|-----|---------------------------------|------|-------|-------|-----|-------|
|                                                                                                                 |     | 1-5                             | 5-10 | 10-15 | 15-20 | >20 | Total |
| Are you currently a faculty member at an academic institution (including the NIH or other similar institution)? | Yes | 52                              | 37   | 27    | 19    | 50  | 185   |
|                                                                                                                 | No  | 52                              | 24   | 8     | 2     | 8   | 94    |

|              |            |           |           |           |           |            |
|--------------|------------|-----------|-----------|-----------|-----------|------------|
| <b>Total</b> | <b>104</b> | <b>61</b> | <b>35</b> | <b>21</b> | <b>58</b> | <b>279</b> |
|--------------|------------|-----------|-----------|-----------|-----------|------------|

G)

| Please rate the following from the most (5) to the least (1) important factors which you feel have been important in your career-NIH or NSF funded programs which increase URM participation | Years in Career (Post training) |     |      |       |       |     |       |
|----------------------------------------------------------------------------------------------------------------------------------------------------------------------------------------------|---------------------------------|-----|------|-------|-------|-----|-------|
|                                                                                                                                                                                              |                                 | 1-5 | 5-10 | 10-15 | 15-20 | >20 | Total |
|                                                                                                                                                                                              | 1                               | 14  | 8    | 7     | 6     | 26  | 61    |
|                                                                                                                                                                                              | 2                               | 7   | 8    | 4     | 4     | 7   | 30    |
|                                                                                                                                                                                              | 3                               | 8   | 10   | 8     | 1     | 7   | 34    |
|                                                                                                                                                                                              | 4                               | 12  | 5    | 6     | 2     | 3   | 28    |
|                                                                                                                                                                                              | 5                               | 25  | 20   | 7     | 7     | 11  | 70    |
|                                                                                                                                                                                              | Total                           | 66  | 51   | 32    | 20    | 54  | 223   |

**Supplemental Figure 2. Analysis of years in career post training and indicated factors.**

Respondents' years in career were analyzed and compared with: **A)** Type of undergraduate institution they attended (URM serving vs Majority serving) ( $\chi^2(4)=12.918$ ,  $P=0.011$ ). **B)** Whether they did undergraduate research ( $\chi^2(4)=13.187$ ,  $P=0.010$ ). **C)** Size of the lab in which they received their PhD ( $\chi^2(16)=38.872$ ,  $P=0.001$ ). **D)** Size of the lab in which they received their first (or only) postdoctoral training ( $\chi^2(16)=27.894$ ,  $P=0.033$ ). **E)** Whether they were members of a professional society ( $\chi^2(4)=10.966$ ,  $P=0.025$ ). **F)** Whether they were faculty members at an academic institution (including the NIH) ( $\chi^2(4)=30.863$ ,  $P<0.0014$ ). **G)** The importance they placed NIH/NSF funded programs to increase diversity in biomedical science (rating 1-5, 5 being the highest;  $\chi^2(16)=28.395$ ,  $P=0.028$ ). Pearson Chi Squared Asymptotic Exact Significance (2 sided).

A)

|                                                                                            |                                             | Please check all that apply concerning your publication record during your undergraduate year |                              |                              |                |       |
|--------------------------------------------------------------------------------------------|---------------------------------------------|-----------------------------------------------------------------------------------------------|------------------------------|------------------------------|----------------|-------|
|                                                                                            |                                             | Lower impact Journal (IF<3)                                                                   | Medium impact Journal (IF>3) | Higher impact Journal (IF>7) | No Publication | Total |
| Which best describes the type of institution where you obtained your undergraduate degree: | Small (<7,000 students) min. serving Inst.  | 7                                                                                             | 4                            | 0                            | 29             | 40    |
|                                                                                            | Large (>7,000 students) min. serving Inst.  | 7                                                                                             | 1                            | 1                            | 20             | 29    |
|                                                                                            | Small (<10,000 students) Maj. serving Inst. | 5                                                                                             | 0                            | 1                            | 34             | 40    |
|                                                                                            | Large (>10,000 students) Maj. serving Inst. | 21                                                                                            | 18                           | 3                            | 56             | 98    |
| Total                                                                                      |                                             | 40                                                                                            | 23                           | 5                            | 139            | 207   |

B)

|                                                                                                |          | Please check all that apply concerning your publication record during your undergraduate years |                               |                              |                |       |
|------------------------------------------------------------------------------------------------|----------|------------------------------------------------------------------------------------------------|-------------------------------|------------------------------|----------------|-------|
|                                                                                                |          | Lower impact Journal (IF<3)                                                                    | Medium impact journal (IF >3) | Higher impact journal (IF>7) | No Publication | Total |
| Do you think you were well prepared for your transition from undergraduate to graduate school? | Yes      | 28                                                                                             | 17                            | 5                            | 77             | 127   |
|                                                                                                | No       | 10                                                                                             | 5                             | 0                            | 36             | 51    |
|                                                                                                | Not Sure | 2                                                                                              | 1                             | 0                            | 26             | 29    |
| Total                                                                                          |          | 40                                                                                             | 23                            | 5                            | 139            | 207   |

C)

|                                                                                                |          | Please check all that apply concerning your publication record during your graduate years |                               |                              |                |       |
|------------------------------------------------------------------------------------------------|----------|-------------------------------------------------------------------------------------------|-------------------------------|------------------------------|----------------|-------|
| Do you think you were well prepared for your transition from undergraduate to graduate school? |          | Lower impact Journal (IF<3                                                                | Medium impact journal (IF >3) | Higher impact journal (IF>7) | No Publication | Total |
|                                                                                                | Yes      | 13                                                                                        | 80                            | 37                           | 5              | 135   |
|                                                                                                | No       | 11                                                                                        | 26                            | 12                           | 2              | 51    |
|                                                                                                | Not Sure | 2                                                                                         | 12                            | 10                           | 8              | 32    |
| Total                                                                                          |          | 26                                                                                        | 118                           | 59                           | 15             | 218   |

D)

|                                                                                           |                               | Please check all that apply concerning your publication record during your postdoctoral years: |                               |                              |                |       |
|-------------------------------------------------------------------------------------------|-------------------------------|------------------------------------------------------------------------------------------------|-------------------------------|------------------------------|----------------|-------|
|                                                                                           |                               | Lower impact Journal (IF<3)                                                                    | Medium impact journal (IF >3) | Higher impact journal (IF>7) | No Publication | Total |
| Please check all that apply concerning your publication record during your graduate years | Lower impact Journal (IF<3)   | 4                                                                                              | 8                             | 6                            | 4              | 22    |
|                                                                                           | Medium impact journal (IF >3) | 4                                                                                              | 49                            | 47                           | 10             | 110   |
|                                                                                           | Higher impact journal (IF>7)  | 1                                                                                              | 5                             | 37                           | 6              | 49    |
|                                                                                           | No Publication                | 3                                                                                              | 2                             | 5                            | 5              | 15    |
|                                                                                           | Total                         | 12                                                                                             | 64                            | 95                           | 25             | 196   |

E)

|                                                                                                      |    | Please check all that apply concerning your publication record during your graduate years |                               |                              |                |            |
|------------------------------------------------------------------------------------------------------|----|-------------------------------------------------------------------------------------------|-------------------------------|------------------------------|----------------|------------|
| How many different post-doctoral training appointments did you have (how many post-docs did you do)? |    | Lower impact Journal (IF<3)                                                               | Medium impact journal (IF >3) | Higher impact journal (IF>7) | No Publication | Total      |
|                                                                                                      | 1  | 15                                                                                        | 63                            | 30                           | 6              | 114        |
|                                                                                                      | 2  | 4                                                                                         | 32                            | 16                           | 0              | 52         |
|                                                                                                      | 3  | 3                                                                                         | 4                             | 0                            | 1              | 8          |
|                                                                                                      | >3 | 0                                                                                         | 0                             | 0                            | 2              | 2          |
| <b>Total</b>                                                                                         |    | <b>22</b>                                                                                 | <b>99</b>                     | <b>46</b>                    | <b>9</b>       | <b>176</b> |

F)

|                                                                                                                 |     | Published in any journal during the specified periods (Yes) |           |            |            |
|-----------------------------------------------------------------------------------------------------------------|-----|-------------------------------------------------------------|-----------|------------|------------|
| Are you currently a faculty member at an academic institution (including the NIH or other similar institution)? |     | Undergraduate                                               | Graduate  | Post-Doc   | Total      |
|                                                                                                                 | Yes | 0                                                           | 9         | 151        | 160        |
|                                                                                                                 | No  | 3                                                           | 13        | 48         | 64         |
| <b>Total</b>                                                                                                    |     | <b>3</b>                                                    | <b>22</b> | <b>199</b> | <b>224</b> |

G)

|                                                                                                                 |     | Please check all that apply concerning your publication record during your postdoctoral years |                               |                              |                |       |
|-----------------------------------------------------------------------------------------------------------------|-----|-----------------------------------------------------------------------------------------------|-------------------------------|------------------------------|----------------|-------|
|                                                                                                                 |     | Lower impact Journal (IF<3)                                                                   | Medium impact journal (IF >3) | Higher impact journal (IF>7) | No Publication | Total |
| Are you currently a faculty member at an academic institution (including the NIH or other similar institution)? | Yes | 10                                                                                            | 48                            | 83                           | 10             | 151   |
|                                                                                                                 | No  | 2                                                                                             | 18                            | 12                           | 16             | 48    |
| Total                                                                                                           |     | 12                                                                                            | 66                            | 95                           | 26             | 199   |

H)

|                                                                            |          | Please check all that apply concerning your publication record during your graduate years |                               |                              |                |       |
|----------------------------------------------------------------------------|----------|-------------------------------------------------------------------------------------------|-------------------------------|------------------------------|----------------|-------|
|                                                                            |          | Lower impact Journal (IF<3)                                                               | Medium impact journal (IF >3) | Higher impact journal (IF>7) | No Publication | Total |
| How long was your 1 <sup>st</sup> (or only) post-doctoral training period? | 1-3 yrs. | 16                                                                                        | 49                            | 27                           | 6              | 98    |
|                                                                            | 3-5 yrs. | 5                                                                                         | 42                            | 10                           | 3              | 60    |
|                                                                            | >5 yrs.  | 0                                                                                         | 8                             | 7                            | 0              | 15    |
|                                                                            | Total    | 21                                                                                        | 99                            | 44                           | 9              | 173   |

I)

|                                                                                                    |     | Please check all that apply concerning your publication record during your graduate years |                               |                              |                |       |
|----------------------------------------------------------------------------------------------------|-----|-------------------------------------------------------------------------------------------|-------------------------------|------------------------------|----------------|-------|
|                                                                                                    |     | Lower impact Journal (IF<3)                                                               | Medium impact journal (IF >3) | Higher impact journal (IF>7) | No Publication | Total |
| Do you have a family member you would describe as a role model who is not in the field of science? | Yes | 19                                                                                        | 85                            | 31                           | 10             | 145   |
|                                                                                                    | No  | 7                                                                                         | 33                            | 28                           | 5              | 73    |

|              |  |           |            |           |           |            |
|--------------|--|-----------|------------|-----------|-----------|------------|
| <b>Total</b> |  | <b>26</b> | <b>118</b> | <b>59</b> | <b>15</b> | <b>218</b> |
|--------------|--|-----------|------------|-----------|-----------|------------|

**Supplemental Figure 3. Analysis of publications as undergraduate or graduate students and indicated factors.** The impact factor (IF) of respondents' publications were analyzed and compared with the indicated factors. **A)** The IF of respondents' publications as undergraduates with the type of undergraduate institution they attended (URM serving vs Majority serving, small vs large;  $\chi^2(9)=17.080$ ,  $P=0.045$ ). **B)** The IF of respondents' publications as undergraduates with whether they were prepared to graduate school transition. **C)** The IF of respondents' publications as graduate students with whether they felt prepared for the transition from undergraduate to graduate training ( $\chi^2(6)=11.240$ ,  $P=0.081$ ). **D)** The IF of respondents' publications as graduate students with the IF of respondents' publications as post docs ( $\chi^2(9)=44.067$ ,  $P<0.0014$ ). **E)** The IF of respondents' publications as graduate students with the number of postdoctoral positions they held ( $\chi^2(9)=44.483$ ,  $P<0.0014$ ). **F)** Publishing (regardless of journal IF) as undergraduates, graduate students or postdocs with whether they were currently faculty members at an academic institution (including the NIH) ( $\chi^2(2)=19.473$ ,  $P<0.0014$ ). **G)** The IF of respondents' publications as postdocs with whether they were currently faculty members at an academic institution (including the NIH;  $\chi^2(3)=27.463$ ,  $P<0.0014$ ). **H)** The IF of respondents' publications as graduate students with the length of the first (or only) postdoctoral positions they held ( $\chi^2(6)=12.187$ ,  $P=0.056$ ). **I)** The IF of respondents' publications as graduate students with having a role model who was a family member outside of science ( $\chi^2(3)=7.288$ ,  $P=0.063$ ). Pearson Chi Squared Asymptotic Exact Significance (2 sided).

A)

| Please check all that apply concerning your publication record during your postdoctoral years |                               | Role model or mentor during the indicated: |    |      |    |          |      |       | Total |
|-----------------------------------------------------------------------------------------------|-------------------------------|--------------------------------------------|----|------|----|----------|------|-------|-------|
|                                                                                               |                               | HS                                         | UG | Grad | PD | Fac/Prof | None | Other |       |
|                                                                                               | Lower impact Journal (IF<3)   | 0                                          | 4  | 0    | 3  | 2        | 1    | 2     |       |
|                                                                                               | Medium impact journal (IF >3) | 1                                          | 2  | 10   | 17 | 32       | 4    | 0     |       |
|                                                                                               | Higher impact journal (IF>7)  | 0                                          | 1  | 8    | 24 | 54       | 6    | 2     |       |
|                                                                                               | No Publication                | 0                                          | 0  | 13   | 3  | 8        | 1    | 1     | 26    |
| Total                                                                                         |                               | 1                                          | 7  | 31   | 47 | 96       | 12   | 5     | 199   |

B)

|                                                                                                                 |     | Please check all that apply concerning your publication record during your postdoctoral years |                               |                              |                |       |
|-----------------------------------------------------------------------------------------------------------------|-----|-----------------------------------------------------------------------------------------------|-------------------------------|------------------------------|----------------|-------|
|                                                                                                                 |     | Lower impact Journal (IF<3)                                                                   | Medium impact journal (IF >3) | Higher impact journal (IF>7) | No Publication | Total |
| Are you currently a faculty member at an academic institution (including the NIH or other similar institution)? | Yes | 10                                                                                            | 48                            | 83                           | 10             | 151   |
|                                                                                                                 | No  | 2                                                                                             | 18                            | 12                           | 16             | 48    |
| Total                                                                                                           |     | 12                                                                                            | 66                            | 95                           | 26             | 199   |

C)

| Published in any journal during the specified periods (Yes) |           | Years in career (post training) |      |       |       |      | Total |
|-------------------------------------------------------------|-----------|---------------------------------|------|-------|-------|------|-------|
|                                                             |           | 1-5                             | 5-10 | 10-15 | 15-20 | > 20 |       |
|                                                             | Undergrad | 3                               | 0    | 0     | 0     | 0    |       |
|                                                             | Graduate  | 8                               | 10   | 1     | 0     | 3    |       |
|                                                             | Post-Doc  | 56                              | 42   | 31    | 20    | 50   |       |
| Total                                                       |           | 67                              | 52   | 32    | 20    | 53   | 224   |

D)

| Published in any journal during the specified periods (Yes) |           | Role model or mentor during the indicated: |    |      |    |          |      |       |       |
|-------------------------------------------------------------|-----------|--------------------------------------------|----|------|----|----------|------|-------|-------|
|                                                             |           | HS                                         | UG | Grad | PD | Fac/Prof | None | Other | Total |
|                                                             | Undergrad | 1                                          | 0  | 2    | 0  | 0        | 0    | 0     | 3     |
|                                                             | Graduate  | 0                                          | 1  | 11   | 0  | 6        | 1    | 2     | 21    |
|                                                             | Post-Doc  | 1                                          | 7  | 31   | 47 | 96       | 12   | 5     | 199   |
| Total                                                       |           | 2                                          | 8  | 44   | 47 | 102      | 13   | 7     | 223   |

E)

| Are you currently a faculty member at an academic institution (including the NIH or other similar institution)? |     | Published in any journal during the specified periods (Yes) |          |          |       |
|-----------------------------------------------------------------------------------------------------------------|-----|-------------------------------------------------------------|----------|----------|-------|
|                                                                                                                 |     | Undergraduate                                               | Graduate | Post-Doc | Total |
|                                                                                                                 | Yes | 0                                                           | 9        | 151      | 160   |
|                                                                                                                 | No  | 3                                                           | 13       | 48       | 64    |
| Total                                                                                                           |     | 3                                                           | 22       | 199      | 224   |

**Supplemental Figure 4. Analysis of publications as post docs and indicated factors.** The impact factor (IF) of respondents' publications were analyzed and compared with the indicated factors. **A)** The IF of respondents' publications as post docs with having a professional role model during the indicated time periods ( $\chi^2(18)=79.952$ ,  $P<0.0014$ ). **B)** The IF of respondents' publications as post docs with whether they were currently faculty members at an academic institution (including the NIH;  $\chi^2(3)=27.463$ ,  $P<0.0014$ ). **C)** Publishing (regardless of journal IF) as undergraduates, graduate students or postdocs with years in career (post training;  $\chi^2(8)=17.666$ ,  $P=0.023$ ). **D)** Publishing (regardless of journal IF) as undergraduates, graduate students or

postdocs with having a professional role model during the indicated time periods ( $\chi^2(12)=64.319$ ,  $P<0.0014$ ). **E)** Publishing (regardless of journal IF) as undergraduates, graduate students or postdocs with whether they were currently faculty members at an academic institution (including the NIH;  $\chi^2(2)=19.473$ ,  $P<0.0014$ ). Pearson Chi Squared Asymptotic Exact Significance (2 sided).

A)

| Have you been<br>or are you a<br>member of a<br>professional<br>scientific<br>organization(s)? |     | Years in career (post training) |      |       |       |      |       |
|------------------------------------------------------------------------------------------------|-----|---------------------------------|------|-------|-------|------|-------|
|                                                                                                |     | 1-5                             | 5-10 | 10-15 | 15-20 | > 20 | Total |
|                                                                                                | Yes | 70                              | 53   | 32    | 21    | 55   | 231   |
|                                                                                                | No  | 5                               | 0    | 0     | 0     | 0    | 5     |
| Total                                                                                          |     | 75                              | 53   | 32    | 21    | 55   | 236   |

B)

|       | During which years were you a member of professional scientific organization(s)? |                              |                                   |                                                   |                              | Total |
|-------|----------------------------------------------------------------------------------|------------------------------|-----------------------------------|---------------------------------------------------|------------------------------|-------|
|       |                                                                                  | Member during graduate years | Member during post-doctoral years | Member during faculty or professional appointment | Member during graduate years |       |
|       | Yes                                                                              | 8                            | 16                                | 121                                               | 8                            | 153   |
|       | No                                                                               | 11                           | 14                                | 31                                                | 11                           | 67    |
|       | Not Sure                                                                         | 4                            | 1                                 | 25                                                | 4                            | 34    |
| Total |                                                                                  | 23                           | 31                                | 177                                               | 23                           | 254   |

C)

|       | Role model or mentor during the indicated time:   |    |    |      |    |          |      |       | Total |
|-------|---------------------------------------------------|----|----|------|----|----------|------|-------|-------|
|       |                                                   | HS | UG | Grad | PD | Fac/Prof | None | Other |       |
|       | Member during graduate years                      | 1  | 0  | 12   | 0  | 6        | 0    | 2     | 21    |
|       | Member during post-doctoral years                 | 1  | 2  | 4    | 14 | 4        | 4    | 0     | 29    |
|       | Member during faculty or professional appointment | 0  | 6  | 28   | 32 | 92       | 9    | 5     | 172   |
| Total |                                                   | 2  | 8  | 44   | 46 | 102      | 13   | 7     | 222   |

**Supplemental Figure 5. Analysis of membership in a professional society and indicated factors.** Respondents' membership in a professional society were analyzed and compared with the indicated factors. **A)** Respondents' membership in a professional society with years in career (post training;  $\chi^2(4)=10.966$ ,  $P=0.025$ ). **B)** Respondents' membership in a professional society during the indicated time periods with whether they felt prepared for the transition from undergraduate to graduate training ( $\chi^2(4)=21.339$ ,  $P<0.0014$ ). **C)** Respondents' membership in a professional society during the indicated time periods with having a professional role model during the indicated time periods ( $\chi^2(12)=58.627$ ,  $P<0.0014$ ). Pearson Chi Squared Asymptotic Exact Significance (2 sided).

A)

|                                         |     | What was the highest degree in your home as you were going through your undergraduate education? |                    |                    |                   |                 |                                                            |       |
|-----------------------------------------|-----|--------------------------------------------------------------------------------------------------|--------------------|--------------------|-------------------|-----------------|------------------------------------------------------------|-------|
|                                         |     | Less than High school degree                                                                     | High school degree | Associate's Degree | Bachelor's degree | Master's degree | Ph.D./M.D. or other terminal degree or professional degree | Total |
| Undergraduate Institution (URM vs. Maj) | URM | 5                                                                                                | 29                 | 2                  | 17                | 15              | 15                                                         | 83    |
|                                         | Maj | 11                                                                                               | 37                 | 21                 | 33                | 26              | 44                                                         | 172   |
| Total                                   |     | 16                                                                                               | 66                 | 23                 | 50                | 41              | 59                                                         | 255   |

B)

|                                                                                                  |                                                            | Undergraduate Institution (Large vs. Small) |                |       |
|--------------------------------------------------------------------------------------------------|------------------------------------------------------------|---------------------------------------------|----------------|-------|
|                                                                                                  |                                                            | Small (<7,000)                              | Large (>7,000) | Total |
| What was the highest degree in your home as you were going through your undergraduate education? | Less than High school degree                               | 2                                           | 14             | 16    |
|                                                                                                  | High school degree                                         | 32                                          | 34             | 66    |
|                                                                                                  | Associate's Degree                                         | 6                                           | 17             | 23    |
|                                                                                                  | Bachelor's degree                                          | 21                                          | 29             | 50    |
|                                                                                                  | Master's degree                                            | 18                                          | 23             | 41    |
|                                                                                                  | Ph.D./M.D. or other terminal degree or professional degree | 17                                          | 42             | 59    |
| Total                                                                                            |                                                            | 96                                          | 159            | 255   |

C)

|                                                                                                  |                                                            | Which best describes the type of institution where you obtained your graduate degree: |                                            |                                             |                                             |       |
|--------------------------------------------------------------------------------------------------|------------------------------------------------------------|---------------------------------------------------------------------------------------|--------------------------------------------|---------------------------------------------|---------------------------------------------|-------|
| What was the highest degree in your home as you were going through your undergraduate education? |                                                            | Small (<7,000 students) min. serving Inst.                                            | Large (>7,000 students) min. serving Inst. | Small (<10,000 students) Maj. serving Inst. | Large (>10,000 students) Maj. serving Inst. | Total |
|                                                                                                  | Less than High school degree                               | 1                                                                                     | 0                                          | 1                                           | 12                                          | 14    |
|                                                                                                  | High school degree                                         | 4                                                                                     | 4                                          | 5                                           | 50                                          | 63    |
|                                                                                                  | Associate's Degree                                         | 0                                                                                     | 0                                          | 5                                           | 15                                          | 20    |
|                                                                                                  | Bachelor's degree                                          | 1                                                                                     | 1                                          | 9                                           | 36                                          | 47    |
|                                                                                                  | Master's degree                                            | 2                                                                                     | 1                                          | 7                                           | 29                                          | 39    |
|                                                                                                  | Ph.D./M.D. or other terminal degree or professional degree | 4                                                                                     | 10                                         | 10                                          | 30                                          | 54    |
|                                                                                                  | <b>Total</b>                                               | 12                                                                                    | 16                                         | 37                                          | 172                                         | 237   |

D)

|                                                                    |                              | Which best describes the type of institution where you obtained your graduate degree: |                               |                              |                |       |
|--------------------------------------------------------------------|------------------------------|---------------------------------------------------------------------------------------|-------------------------------|------------------------------|----------------|-------|
| What was the highest degree in your home as you were going through |                              | Lower impact Journal (IF<3)                                                           | Medium impact journal (IF >3) | Higher impact journal (IF>7) | No Publication | Total |
|                                                                    | Less than High school degree | 3                                                                                     | 8                             | 3                            | 1              | 15    |
|                                                                    | High school degree           | 3                                                                                     | 18                            | 28                           | 4              | 53    |
|                                                                    | Associate's Degree           | 2                                                                                     | 3                             | 4                            | 5              | 14    |
|                                                                    | Bachelor's degree            | 2                                                                                     | 15                            | 18                           | 5              | 40    |
|                                                                    |                              |                                                                                       |                               |                              |                |       |

|                                      |                                                                   |    |    |    |    |            |
|--------------------------------------|-------------------------------------------------------------------|----|----|----|----|------------|
| <b>your undergraduate education?</b> | <b>Master's degree</b>                                            | 0  | 8  | 14 | 7  | <b>29</b>  |
|                                      | <b>Ph.D./M.D. or other terminal degree or professional degree</b> | 2  | 14 | 28 | 4  | <b>48</b>  |
| <b>Total</b>                         |                                                                   | 12 | 66 | 95 | 26 | <b>199</b> |

E)

|                                                              |            | <b>What was the highest degree in your home as you were going through your undergraduate education?</b> |                           |                           |                          |                        |                                                                   |              |
|--------------------------------------------------------------|------------|---------------------------------------------------------------------------------------------------------|---------------------------|---------------------------|--------------------------|------------------------|-------------------------------------------------------------------|--------------|
| <b>Did you perform research as an undergraduate student?</b> |            | <b>Less than High school degree</b>                                                                     | <b>High school degree</b> | <b>Associate's Degree</b> | <b>Bachelor's degree</b> | <b>Master's degree</b> | <b>Ph.D./M.D. or other terminal degree or professional degree</b> | <b>Total</b> |
|                                                              | <b>Yes</b> | 12                                                                                                      | 13                        | 19                        | 42                       | 32                     | 50                                                                | 198          |
|                                                              | <b>No</b>  | 4                                                                                                       | 23                        | 4                         | 8                        | 9                      | 8                                                                 | 56           |
| <b>Total</b>                                                 |            | <b>16</b>                                                                                               | <b>66</b>                 | <b>23</b>                 | <b>50</b>                | <b>41</b>              | <b>58</b>                                                         | <b>254</b>   |

F)

|                                                                                                           |            | <b>Do you think you were well prepared for your transition from undergraduate to graduate school?</b> |           |                 |              |
|-----------------------------------------------------------------------------------------------------------|------------|-------------------------------------------------------------------------------------------------------|-----------|-----------------|--------------|
| <b>Do you have a family member you would describe as a role model who is not in the field of science?</b> |            | <b>Yes</b>                                                                                            | <b>No</b> | <b>Not Sure</b> | <b>Total</b> |
|                                                                                                           | <b>Yes</b> | 103                                                                                                   | 29        | 22              | 154          |
|                                                                                                           | <b>No</b>  | 37                                                                                                    | 27        | 10              | 74           |
| <b>Total</b>                                                                                              |            | <b>140</b>                                                                                            | <b>56</b> | <b>32</b>       | <b>228</b>   |

**Supplemental Figure 6. Analysis of highest degree in the home and indicated factors.** The highest degree in respondents' home during their undergraduate years were analyzed and compared with the indicated factors. **A)** The highest degree in respondents' home during their undergraduate years with the type of undergraduate institution they attended (URM serving vs Majority serving;  $\chi^2(5)=11.590$ ,  $P=0.040$ ). **B)** The highest degree in respondents' home during their undergraduate years with the type of undergraduate institution they attended (Large vs Small;  $\chi^2(5)=11.970$ ,  $P=0.034$ ). **C)** The highest degree in respondents' home during their undergraduate years with the type of graduate institution where they received their PhD (URM serving vs Majority serving, large vs small;  $\chi^2(15)=26.593$ ,  $P=0.032$ ). **D)** The highest degree in respondents' home during their undergraduate years with the graduate institution they attended (URM serving vs Majority serving;  $\chi^2(5)=16.555$ ,  $P=0.006$ ). **E)** The highest degree in respondents' home during their undergraduate years with whether they performed undergraduate research ( $\chi^2(5)=10.028$ ,  $P=0.073$ ). **F)** Whether they felt prepared for the transition from undergraduate to graduate training and whether they had a family member as a role model who was not in science ( $\chi^2(2)=8.685$ ,  $P=0.013$ ). Pearson Chi Squared Asymptotic Exact Significance (2 sided).

A)

|                                                                                                                        |              | <b>What was the highest degree in your home as you were going through your undergraduate education?</b> |                    |                    |                    |                    |                                                                   |              |
|------------------------------------------------------------------------------------------------------------------------|--------------|---------------------------------------------------------------------------------------------------------|--------------------|--------------------|--------------------|--------------------|-------------------------------------------------------------------|--------------|
| <b>Are you currently a faculty member at an academic institution (including the NIH or other similar institution)?</b> |              | <b>Less than H.S. degree</b>                                                                            | <b>H.S. degree</b> | <b>A.A. degree</b> | <b>B.S. degree</b> | <b>M.S. degree</b> | <b>Ph.D./M.D. or other terminal degree or professional degree</b> | <b>Total</b> |
|                                                                                                                        | <b>Yes</b>   | 13                                                                                                      | 50                 | 12                 | 33                 | 22                 | 47                                                                | 177          |
|                                                                                                                        | <b>No</b>    | 3                                                                                                       | 16                 | 11                 | 17                 | 19                 | 12                                                                | 78           |
|                                                                                                                        | <b>Total</b> | <b>16</b>                                                                                               | <b>66</b>          | <b>23</b>          | <b>50</b>          | <b>41</b>          | <b>59</b>                                                         | <b>255</b>   |

B)

|                                                                                                                        |              | <b>Which best describes the type of institution where you obtained your PhD degree (URM vs Maj):</b> |            |              |
|------------------------------------------------------------------------------------------------------------------------|--------------|------------------------------------------------------------------------------------------------------|------------|--------------|
| <b>Are you currently a faculty member at an academic institution (including the NIH or other similar institution)?</b> |              | <b>URM</b>                                                                                           | <b>Maj</b> | <b>Total</b> |
|                                                                                                                        | <b>Yes</b>   | 15                                                                                                   | 150        | 165          |
|                                                                                                                        | <b>No</b>    | 13                                                                                                   | 59         | 72           |
|                                                                                                                        | <b>Total</b> | <b>28</b>                                                                                            | <b>209</b> | <b>237</b>   |

C)

|                                                                                 |            | <b>Do you think you were well prepared for your transition from undergraduate to graduate school?</b> |           |                 |              |
|---------------------------------------------------------------------------------|------------|-------------------------------------------------------------------------------------------------------|-----------|-----------------|--------------|
| <b>Are you currently a faculty member at an academic institution (including</b> |            | <b>Yes</b>                                                                                            | <b>No</b> | <b>Not Sure</b> | <b>Total</b> |
|                                                                                 | <b>Yes</b> | 117                                                                                                   | 33        | 23              | 173          |
|                                                                                 | <b>No</b>  | 37                                                                                                    | 28        | 11              | 76           |
|                                                                                 |            |                                                                                                       |           |                 |              |

|                                        |            |           |           |            |
|----------------------------------------|------------|-----------|-----------|------------|
| the NIH or other similar institution)? |            |           |           |            |
| <b>Total</b>                           | <b>154</b> | <b>61</b> | <b>34</b> | <b>249</b> |

D)

|                                                                                                                        |            | <b>Did you get post-doctoral training (post-doc)?</b> |           |              |
|------------------------------------------------------------------------------------------------------------------------|------------|-------------------------------------------------------|-----------|--------------|
|                                                                                                                        |            | <b>Yes</b>                                            | <b>No</b> | <b>Total</b> |
| <b>Are you currently a faculty member at an academic institution (including the NIH or other similar institution)?</b> | <b>Yes</b> | 145                                                   | 22        | 167          |
|                                                                                                                        | <b>No</b>  | 46                                                    | 25        | 71           |
| <b>Total</b>                                                                                                           |            | <b>191</b>                                            | <b>47</b> | <b>238</b>   |

E)

|                                                                                                                        |            | <b>Rated as important in career:</b> |                          |                                                                    |              |                                                               | <b>Total</b> |
|------------------------------------------------------------------------------------------------------------------------|------------|--------------------------------------|--------------------------|--------------------------------------------------------------------|--------------|---------------------------------------------------------------|--------------|
|                                                                                                                        |            | <b>Mentorship</b>                    | <b>Financial Support</b> | <b>NIH or NSF funded Programs which increase URM participation</b> | <b>Peers</b> | <b>Opportunities for exploring science (conferences etc.)</b> |              |
| <b>Are you currently a faculty member at an academic institution (including the NIH or other similar institution)?</b> | <b>Yes</b> | 5                                    | 3                        | 41                                                                 | 18           | 8                                                             | 75           |
|                                                                                                                        | <b>No</b>  | 6                                    | 2                        | 8                                                                  | 8            | 9                                                             | 33           |
| <b>Total</b>                                                                                                           |            | <b>11</b>                            | <b>5</b>                 | <b>49</b>                                                          | <b>26</b>    | <b>17</b>                                                     | <b>108</b>   |

**Supplemental Figure 7. Analysis of differences between respondents working in academic institutions vs. non-academic institutions. A)** The highest degree in respondents' home during their undergraduate years with whether or not they currently work in an academic institution ( $\chi^2(5)=13.512, P=0.018$ ). **B)** The type of graduate institution where they received their PhD (URM serving vs Majority serving) with whether or not they currently work in an academic institution

( $\chi^2(1)=3.867$ ,  $P=0.078$ ). **C)** Whether they felt prepared for the transition from undergraduate to graduate school with whether or not they currently work in an academic institution ( $\chi^2(2)=9.922$ ,  $P=0.007$ ). **D)** Whether they did postdoctoral training with whether or not they currently work in an academic institution ( $\chi^2(1)=15.267$ ,  $P<0.0014$ ). **E)** Whether they rated as important the indicated factors as important for their career development with whether or not they currently work in an academic institution ( $\chi^2(4)=11.884$ ,  $P=0.016$ ). Pearson Chi Squared Asymptotic Exact Significance (2 sided).

**Supplemental Table 1.** Odds ratio estimates by logistic regressions involving being in an academic position and other factors for URM success.

| Specific factors                                                             | Odds ratios | Comparisons                                                                               | P value             |
|------------------------------------------------------------------------------|-------------|-------------------------------------------------------------------------------------------|---------------------|
| <i>Feeling prepared for transition from undergraduate to graduate school</i> | 2.202       | for those who felt prepared vs those who did not feel prepared or were unsure.            | <0.005 <sup>¶</sup> |
| <i>Education and training</i>                                                | 0.319       | for respondents who received PhDs at large min. serving inst. vs large maj. serving inst. | <0.031              |
|                                                                              | 0.454       | for respondents who received PhDs at min. serving inst. regardless of size                | <0.05               |
|                                                                              | 3.582       | for those who did a postdoc vs those who did not                                          | <0.001              |
| <i>Publication Record</i>                                                    | 4.545       | for having published as a postdoc compared to having published as graduate students       | <0.004 <sup>¶</sup> |
|                                                                              | 8           | for those with publications in lower IF journal vs no publication                         | <0.02               |
|                                                                              | 4.267       | for those with publications in medium IF journal vs no publication                        | <0.003              |
|                                                                              | 11.067      | for those with publications in high IF journal vs no publication                          | <0.001              |
| <i>Professional Society Membership</i>                                       | 0.022       | for membership as a graduate student vs membership as faculty                             | <0.001 <sup>¶</sup> |
|                                                                              | 0.061       | for membership as a postdocs vs membership as faculty                                     | <0.001 <sup>¶</sup> |
| <i>Level of education in home during undergraduate</i>                       | 0.279       | for those where highest degree was AA vs those who had a PhD/MD or other prof degree      | <0.02               |
|                                                                              | 0.296       | for those where highest degree was MS vs those who had a PhD/MD or other prof degree      | <0.007              |

<sup>¶</sup>Bonferroni correction for multiple comparisons, p<0.05 as significant.

**Supplemental Table 2.** Odds ratio estimates by logistic regressions involving being in a non-academic position and other factors for URM success.

| Specific factors                                                             | Odds ratios | Comparisons                                                                               | P value             |
|------------------------------------------------------------------------------|-------------|-------------------------------------------------------------------------------------------|---------------------|
| <i>Feeling prepared for transition from undergraduate to graduate school</i> | 0.454       | for those who felt prepared compared to those who did not feel prepared or were unsure    | <0.005 <sup>¶</sup> |
| <i>Education and training</i>                                                | 3.137       | for respondents who received PhDs at large min. serving inst. vs large maj. serving inst. | <0.031              |
|                                                                              | 0.454       | for respondents who received PhDs at min. serving inst. regardless of size                | <0.05               |
|                                                                              | 0.279       | for those who did a postdoc vs those who did not                                          | <0.001              |
| <i>Publication Record</i>                                                    | 4.545       | for having published as a graduate student compared to having published as a postdoc      | <0.003 <sup>¶</sup> |
|                                                                              | 0.125       | for those who have publications in lower IF journal vs no publication                     | <0.02               |
|                                                                              | 0.234       | for those who publications in medium IF journal vs no publication                         | <0.003              |
|                                                                              | 0.090       | for those who publications in high IF journal vs no publication                           | <0.001              |
| <i>Level of education in home during undergraduate</i>                       | 3.590       | for those where highest degree was AA vs those who had a PhD/MD or other prof degree      | <0.02               |
|                                                                              | 3.383       | for those where highest degree was MS vs those who had a PhD/MD or other prof degree      | <0.007              |

<sup>¶</sup>Bonferroni correction for multiple comparisons, p<0.05 as significant.

## **SURM Study**

**Project Title:** Factors contributing to the success of underrepresented minorities in the life sciences (Success of Underrepresented Minorities Survey, SURM Survey)

**Principal Investigator:** Prof. Avery August

Department of Microbiology & Immunology

Cornell University

Email: aa749@cornell.edu

Phone: 607-253-3401

**What the study is about**

The purpose of the research study is to identify the factors that are responsible for the success of life scientists from underrepresented minority (URM\*) groups (\*as defined by the guidelines of the National Institutes of Health (NIH)).

**What we will ask you to do**

We will ask you to complete a survey about your career. You will also be asked to provide brief comments regarding your career. This survey will take approximately 10 minutes of your time.

**Risks and discomforts**

We do not anticipate any risks from participating in this study.

**Benefits**

Information from this survey may lead to the development of more effective strategies for increasing the number of underrepresented minorities in the life sciences. However, there are no direct benefits to the participant.

**Alternatives**

N/A

**Payment for participation**

There is no payment for taking part in the study.

**Audio/Video Recording**

No audio/video recording will be used.

**Privacy/Confidentiality**

All information will be collected in a de-identified manner and the aggregated responses analyzed. The results of the survey may be presented, published or disseminated. We

anticipate that your participation in this survey presents no greater risk than everyday use of the Internet.

### **Taking part is voluntary**

Participating in the survey is voluntary, and you may refuse to participate before the study begins. If you chose to continue with the survey, you will be required to answer all survey questions.

### **If you have questions**

The main researchers conducting this study are Drs. Avery August (Cornell University), Arturo Casadevall (Albert Einstein College of Medicine), Dwayne Boucaud (Quinnipiac University) and Luis Martinez (New York Institute of Technology). The main contact for IRB purposes is Dr. Avery August. Please ask any questions you have now. If you have questions later, you may contact Dr. August at [aa749@cornell.edu](mailto:aa749@cornell.edu) or at 607-253-3401. If you have any questions or concerns regarding your rights as a subject in this study, you may contact the Institutional Review Board (IRB) for Human Participants at 607-255-6182 or access their website at <http://www.irb.cornell.edu>. You may also report your concerns or complaints anonymously through Ethicspoint online at [www.hotline.cornell.edu](http://www.hotline.cornell.edu) or by calling toll free at 1-866-293-3077. Ethicspoint is an independent organization that serves as a liaison between the University and the person bringing the complaint so that anonymity can be ensured.

### **Statement of Consent**

I have read the above information, and have received answers to any questions I asked. I consent to take part in the study, indicating by clicking the "I agree" button.

This consent form will be kept by the researcher for at least five years beyond the end of the study.

☐ I agree (1)

☐ I do not agree (2)

If I do not agree Is Selected, Then Skip To End of Survey

Answer If Project Title:&nbsp;Factors contributing to success of underrepresented biomedical scientists &nbsp; Principal Investigator:&nbsp;Prof. Avery August Department of Microbi... I agree Is Selected

Q1 How many years have you been in your career post (training post, excluding post-doctoral training period)?

- ☐ 1-5 (1)
- ☐ 5-10 (2)
- ☐ 10-15 (3)
- ☐ 15-20 (4)
- ☐ greater than 20 (5)

Q2 How many years have you been at your current institution?

- ☐ 1-5 (1)
- ☐ 6-10 (2)
- ☐ 11-15 (3)
- ☐ 16-20 (4)
- ☐ greater than 20 (5)

Q33 What is your primary scientific discipline?

- ☐ Anatomy (1)
- ☐ Biochemistry (2)
- ☐ Cell Biology (3)
- ☐ Molecular Biology (4)
- ☐ General Biology (5)
- ☐ Ecology & Evolution (6)
- ☐ Developmental Biology (7)
- ☐ Microbiology (8)
- ☐ Immunology (9)
- ☐ General Medical Sciences (10)
- ☐ Computational Biology (11)
- ☐ Genetics (12)
- ☐ Neuroscience (13)
- ☐ Physiology (14)
- ☐ Other (15) \_\_\_\_\_

Q29 Are you currently a faculty member at an academic institution (including the NIH or other similar non-profit institutes)?

- ☐ Yes (1)
- ☐ No (2)

Answer If Are you currently a faculty member at an academic institution (including the NIH or other similar non-profit institutes)? (revised to include NIH etc) Yes Is Selected

Q28 Which best describes the type of institution where you currently work:

- ☐ small (less than 7,000 students) minority serving institution (1)
- ☐ large (more than 7,000 students) minority serving institution (2)
- ☐ small (less than 10,000 students) majority serving institution (3)
- ☐ large (more than 10,000 students) majority serving institution (4)
- ☐ Not applicable (5)

Answer If Which best describes the type of institution where you currently work. (new question ) small (less than 10,000 students) majority serving institution Is Selected Or Which best describes the type of institution where you currently work. (new question ) large (more than 10,000 students) majority serving institution Is Selected

Q17 Is there a significant URM population at your current institution?

- ☐ Yes (1)
- ☐ No (2)

Answer If Are you currently a faculty member at an academic institution (including the NIH or other similar non-profit institutes)? (revised to include NIH etc) No Is Selected

Q32 Which best describes the type of non-academic institution where you currently work:

- ☐ Small company (1)
- ☐ Large company (2)
- ☐ Non-Profit (3)
- ☐ Other (4) \_\_\_\_\_

Q34 Did you attend a community college?

- ☐ Yes (1)
- ☐ No (2)

Q6 Which best describes the type of institution where you obtained your undergraduate degree:

- ☐ small (less than 7,000 students) minority serving institution (1)
- ☐ large (more than 7,000 students) minority serving institution (2)
- ☐ small (less than 10,000 students) majority serving institution (3)
- ☐ large (more than 10,000 students) majority serving institution (4)

Q8 What was the highest degree in your home as you were going through your undergraduate education?

- ☐ Less than High school degree (1)
- ☐ High school degree (2)
- ☐ Associate's Degree (3)
- ☐ Bachelor's degree (4)
- ☐ Master's degree (5)
- ☐ Ph.D./M.D. or other terminal degree or professional degree (6)

Q27 Did you perform research as an undergraduate student?

- ☐ Yes (1)
- ☐ No (2)

Q7 Which best describes the type of institution where you obtained your Ph.D.:

- ☐ small (less than 7,000 students) minority serving institution (1)
- ☐ large (more than 7,000 students) minority serving institution (2)
- ☐ small (less than 10,000 students) majority serving institution (3)
- ☐ large (more than 10,000 students) majority serving institution (4)

Q31 Do you think you were well prepared for your transition from undergraduate to graduate school?

- ☐ Yes (1)
- ☐ No (2)
- ☐ Not sure (3)

Q4 Which best describes the size of the laboratory group where you gained your Ph.D.?

- ☐ 1-5 individuals (1)
- ☐ 6-10 individuals (2)
- ☐ 11-15 individuals (3)
- ☐ 16-20 individuals (4)
- ☐ Greater than 20 individuals (5)

Q3 Did you get post-doctoral training (post-doc)?

- ☐ Yes (1)
- ☐ No (2)

Answer If Did you get post-doctoral training (post-doc)? Yes Is Selected

Q37 How many different post-doctoral training appointments did you have (how many post-docs did you do)?

- ☐ 1 (1)
- ☐ 2 (2)
- ☐ 3 (3)
- ☐ more then 3 (4)

Answer If How many different post-doctoral training appointments did you have (how many post-docs did you do)? 1 Is Selected Or How many different post-doctoral training appointments did you have (how many post-docs did you do)? 2 Is Selected Or How many different post-doctoral training appointments did you have (how many post-docs did you do)? 3 Is Selected Or How many different post-doctoral training appointments did you have (how many post-docs did you do)? more then 3 Is Selected

Q26 How long was your first (or only) post-doctoral training period?

- ☐ 1-3 years (1)
- ☐ 3-5 years (2)
- ☐ greater than 5 years (3)

Answer If How many different post-doctoral training appointments did you have (how many post-docs did you do)? 2 Is Selected Or How many different post-doctoral training appointments did you have (how many post-docs did you do)? 3 Is Selected Or How many different post-doctoral training appointments did you have (how many post-docs did you do)? more then 3 Is Selected

Q38 How long was your second post-doctoral training period?

- ☐ 1-3 years (1)
- ☐ 3-5 years (2)
- ☐ greater than 5 years (3)

Answer If How many different post-doctoral training appointments did you have (how many post-docs did you do)? 3 Is Selected Or How many different post-doctoral training appointments did you have (how many post-docs did you do)? more then 3 Is Selected

Q39 How long was your third (or more) post-doctoral training period?

- ☐ 1-3 years (1)
- ☐ 3-5 years (2)
- ☐ greater than 5 years (3)

Answer If How many different post-doctoral training appointments did you have (how many post-docs did you do)? 1 Is Selected Or How many different post-doctoral training appointments did you have (how many post-docs did you do)? 2 Is Selected Or How

many different post-doctoral training appointments did you have (how many post-docs did you do)? 3 Is Selected Or How many different post-doctoral training appointments did you have (how many post-docs did you do)? more then 3 Is Selected

Q5 Which best describes the size of the laboratory group where you got your first (or only) post-doctoral training?

- ☐ 1-5 individuals (1)
- ☐ 6-10 individuals (2)
- ☐ 11-15 individuals (3)
- ☐ 16-20 individuals (4)
- ☐ Greater than 20 individuals (5)

Answer If How many different post-doctoral training appointments did you have (how many post-docs did you do)? 2 Is Selected Or How many different post-doctoral training appointments did you have (how many post-docs did you do)? 3 Is Selected Or How many different post-doctoral training appointments did you have (how many post-docs did you do)? more then 3 Is Selected

Q40 Which best describes the size of the laboratory group where you got your second post-doctoral training?

- ☐ 1-5 individuals (1)
- ☐ 6-10 individuals (2)
- ☐ 11-15 individuals (3)
- ☐ 16-20 individuals (4)
- ☐ Greater than 20 individuals (5)

Answer If How many different post-doctoral training appointment did you have (how many post-docs did you do)? 3 Is Selected Or How many different post-doctoral training appointment did you have (how many post-docs did you do)? more then 3 Is Selected

Q41 What best describes the size of the laboratory group where you got your third or more post-doctoral training?

- ☐ 1-5 individuals (1)
- ☐ 6-10 individuals (2)
- ☐ 11-15 individuals (3)
- ☐ 16-20 individuals (4)
- ☐ Greater than 20 individuals (5)

Q10 Have you been or are you a member of a professional scientific organization(s)?

- ☐ Yes (1)
- ☐ No (2)

Answer If Have you been or are you a member of a professional scientific organization(s). Yes Is Selected

Q9 Please check all of the following that apply regarding your time as a member of the professional scientific organization(s):

- ☐ Member during undergraduate years (1)
- ☐ Member during graduate years (2)
- ☐ Member during post-doctorate years (3)
- ☐ Member during faculty appointment/professional appointment (4)

Answer If Have you been or are you a member of a professional scientific organization(s). Yes Is Selected

Q11 Is there a significant URM population in the professional society which you are most active?

- ☐ Yes (1)
- ☐ No (2)

Answer If Have you been or are you a member of a professional scientific organization(s). Yes Is Selected

Q12 Are you or have you been a member of a underrepresented minority (URM) group/committee in a professional organization?

- ☐ Yes (1)
- ☐ No (2)

Answer If Are you or have you been a member of a underrepresented minority (URM) group/committee in a prof... Yes Is Selected

Q13 During which phase(s) of your career were you a member of a URM group/committee in a professional organization?

- ☐ Member during undergraduate years (1)
- ☐ Member during graduate years (2)
- ☐ Member during post-doctorate years (3)
- ☐ Member during faculty appointment/professional appointment (4)

Answer If Have you been or are you a member of a professional scientific organization(s). Yes Is Selected

Q14 Do you attribute your success to participation in a professional society?

- ☐ Yes (1)
- ☐ No (2)

Q15 Please rate the following activities coming from participation in a professional committee (URM or majority) that contributed to your success.

|  | Not Helpful<br>(1) | Somewhat<br>Helpful (2) | Helpful (3) | Very Helpful<br>(4) | Not<br>Applicable<br>(5) |
|--|--------------------|-------------------------|-------------|---------------------|--------------------------|
|  |                    |                         |             |                     |                          |

Q16 Please rate the following from the most (5) to the least (1) important factors which you feel have led to your career success.

|  | 1 (1) | 2 (2) | 3 (3) | 4 (4) | 5 (5) |
|--|-------|-------|-------|-------|-------|
|  |       |       |       |       |       |

Q18 Do you have a family member you would describe as a role model who is faculty at an institute of higher education?

- ☐ Yes (1)
- ☐ No (2)

Q19 Do you have a family member you would describe as a role model who is a scientist at something other than an academic institution?

- ☐ Yes (1)
- ☐ No (2)

Q20 Do you have a family member you would describe as a role model who is not in the field of science?

- ☐ Yes (1)
- ☐ No (2)

Answer If Do you have a family member whom you would describe as a role model who is faculty at an institu... Yes Is Selected Or Do you have a family member whom you would describe as a role model who is a scientist at someth... Yes Is Selected Or Do you have a family member whom you would describe as a role model who is not in the field of s... Yes Is Selected

Q21 Please list the relationship of the family member(s) whom were your role models.

Q22 Please pick from the list below any areas where you had a prominent professional role model or mentor:

- ☐ High School (1)
- ☐ Undergraduate School (2)
- ☐ Graduate School (3)
- ☐ Post doctoral Position (4)
- ☐ Faculty Position/Professional position (5)
- ☐ Had no role model (6)
- ☐ Other: (7) \_\_\_\_\_

Q23 Please pick from the list below any areas where you had a prominent role model or mentor who is not in the field of science:

- ☐ High School (1)
- ☐ Undergraduate School (2)
- ☐ Graduate School (3)
- ☐ Post doctoral Position (4)
- ☐ Faculty Position/Professional position (5)
- ☐ Had no role model (6)
- ☐ Other: (7) \_\_\_\_\_

Q24 Please check all that apply concerning your publication record during the specified periods:

|  | lower impact<br>journal (IF | medium impact<br>journal (IF >3 | higher impact<br>journal (IF>7)<br>(3) | no publication<br>(4) |
|--|-----------------------------|---------------------------------|----------------------------------------|-----------------------|
|  |                             |                                 |                                        |                       |

Q30 Do you think you were well prepared for your transition to your current position?

- ☐ Yes (1)
- ☐ No (2)

Q42 Are you a member of any of the following groups:

- ☐ American Indian or Alaska Native (1)
- ☐ Black or African American (2)
- ☐ Hispanic or Latino (3)
- ☐ Native Hawaiian or Other Pacific Islander (4)
- ☐ Other (5) \_\_\_\_\_

Q25 Are there any other enablers of your success which you feel were not mentioned in this survey? Please explain them below.
